# Supplementary material for: Characterization and Functional Analysis of a New Calcium/Calmodulin-Dependent Protein Kinase (CaMK1) in the Citrus Pathogenic Fungus Penicillium italicum
Source: MDPI journal article supplement (doi:10.3390/jof8070667), 2022-06-25
Supplement: s1 [file s1]

Supplementary materials

|               |                                                                                                             |      |
|---------------|-------------------------------------------------------------------------------------------------------------|------|
| Coding region | 1 ATGCTCAACAAAGCTGTCCGGGAGCCGGAGAGCTATGAAAAGAGTACAGCCTCTTATCGTAGCTACCTTGCCCCACATTGCGTAACCTGATTTTCGCT        | 100  |
| ORF           | 1 ATGCTCAACAAAGCTGTCCGGGAGCCGGAGAGCTATGAAAAGAA.....                                                         | 45   |
| Coding region | 101 GGCCTATAGGGCTCTCTATAAATTCGACGGACGCTGGGCGCCGGTACATACGGAATTGTTTCGCGAGGCGGATTCTACCGACGGACAGAAAGGTTGCGGTCA  | 200  |
| ORF           | 46 .....GGCTCTCTATAAATTCGACGGACGCTGGGCGCCGGTACATACGGAATTGTTTCGCGAGGCGGATTCTACCGACGGACAGAAAGGTTGCGGTCA       | 136  |
| Coding region | 201 AGATAAATTCGAAAGAAAATGTTCTGGTAAACGAGGGCATGGTCCACGATGAGCTTGAAATGCTGCAATCACTCCAACATCCCCACATTGTTTCGTTCTG    | 300  |
| ORF           | 137 AGATAAATTCGAAAGAAAATGTTCTGGTAAACGAGGGCATGGTCCACGATGAGCTTGAAATGCTGCAATCACTCCAACATCCCCACATTGTTTCGTTCTG    | 236  |
| Coding region | 301 CGACTGGTTGCAATCTAAGGTGAGCAGCTCTCTGTTTGGTCCGGTCGTTGCGAGAGCTCTAACCGTGGACCTAGGACAAATTCATATCGTTACACAGCTA    | 400  |
| ORF           | 237 CGACTGGTTGCAATCTAAG.....GACAAATTCATATCGTTACACAGCTA                                                      | 282  |
| Coding region | 401 GCCACCGGTGGCGAGCTGTTTCGACCGGATTTGCGAGTATGGCAAGTTCACCGAGAAAGGATGCGTCGCGAGACCATCCGCCAGGTGCTTGATGCTGTGGACT | 500  |
| ORF           | 283 GCCACCGGTGGCGAGCTGTTTCGACCGGATTTGCGAGTATGGCAAGTTCACCGAGAAAGGATGCGTCGCGAGACCATCCGCCAGGTGCTTGATGCTGTGGACT | 382  |
| Coding region | 501 ATCTACACAAGCGCAACATTGTTTACCGAGGTCGGCTCTTCTTAATGCATTCCGTGCTCTTACATGTAACCTAACCCGCGGAGAACTTGAACCCGAGAAAC   | 600  |
| ORF           | 383 ATCTACACAAGCGCAACATTGTTTACCGAGGTCGGCTCTTCTTAATGCATTCCGTGCTCTTACATGTAACCTAACCCGCGGAGAACTTGAACCCGAGAAAC   | 430  |
| Coding region | 601 TCCTCTACCTCACCCGCGCTGCGACTCTCAACTGGTCTTGGCCGATTTTCGGTATTGCGAAGATGCTGCACAGCCCTTCTGAGGTACTGACCAAGCATGGC   | 700  |
| ORF           | 431 TCCTCTACCTCACCCGCGCTGCGACTCTCAACTGGTCTTGGCCGATTTTCGGTATTGCGAAGATGCTGCACAGCCCTTCTGAGGTACTGACCAAGCATGGC   | 530  |
| Coding region | 701 CGGCTCCTTTGGATATGCTGCTCCTGAGGTGATGCTCAAGCAGGGCCACGGCAAGGCTGTCGATATGTTGGTGGCTGGTGTATCACCCTATACCCCTCTA    | 800  |
| ORF           | 531 CGGCTCCTTTGGATATGCTGCTCCTGAGGTGATGCTCAAGCAGGGCCACGGCAAGGCTGTCGATATGTTGGTGGCTGGTGTATCACCCTATACCCCTCTA    | 630  |
| Coding region | 801 TGTGGCTACTCCCGCTTCGATCCGAGAACTTGACCGACCTCATCGAAGATGCGGAACAGGCGCGATCATCTTCCACGAGCGGTACTGGCGCGAGCTGT      | 900  |
| ORF           | 631 TGTGGCTACTCCCGCTTCGATCCGAGAACTTGACCGACCTCATCGAAGATGCGGAACAGGCGCGATCATCTTCCACGAGCGGTACTGGCGCGAGCTGT      | 730  |
| Coding region | 901 CCCAGGACGCCAAAGATTTCATTCTTACCTCTCTGAATACGGACCCACCAAGCGAGTTACCTCTGAGGAAAGCCCTCAAGCACGATGGCTGACCGGAGAA    | 1000 |
| ORF           | 731 CCCAGGACGCCAAAGATTTCATTCTTACCTCTCTGAATACGGACCCACCAAGCGAGTTACCTCTGAGGAAAGCCCTCAAGCACGATGGCTGACCGGAGAA    | 830  |
| Coding region | 1001 GACTGCGAGCGACCGTGACTTGTGCTGAAATCCGACCTACATTGACGCTGCGCGCTCGCGCGGAAATCGAGATCGTCAAGCTTGCCAAACCGTATC       | 1100 |
| ORF           | 831 GACTGCGAGCGACCGTGACTTGTGCTGAAATCCGACCTACATTGACGCTGCGCGCTCGCGCGGAAATCGAGATCGTCAAGCTTGCCAAACCGTATC        | 930  |
| Coding region | 1101 GAGTCACTCAAGATGCACGAAGAGGACGGGGATGAGGAGGATATCCCAAGTGGCTGGACATGGGCGAGTCAACCAAAGAGTCAAGTGCAGCGGAGCCAT    | 1200 |
| ORF           | 931 GAGTCACTCAAGATGCACGAAGAGGACGGGGATGAGGAGGATATCCCAAGTGGCTGGACATGGGCGAGTCAACCAAAGAGTCAAGTGCAGCGGAGCCAT     | 1030 |
| Coding region | 1201 CAGTGCAGGCAACGATGCGAGTCCGCGCCCTGCGCCACACAAAGAAAGAGTCTGTCCGCGCTGCTCGCGGTGCTATTTTCGCTGAAGTTGTTCTGGC      | 1300 |
| ORF           | 1031 CAGTGCAGGCAACGATGCGAGTCCGCGCCCTGCGCCACACAAAGAAAGAGTCTGTCCGCGCTGCTCGCGGTGCTATTTTCGCTGAAGTTGTTCTGGC      | 1130 |
| Coding region | 1301 TAAGGTCCTGAGCAGAAAGGAGACTGAGGAGCGGGAGAAAGTTGAACGTGAAGCTCGCGAAAAGGCTGCTTCGCTGCTAG                       | 1379 |
| ORF           | 1131 TAAGGTCCTGAGCAGAAAGGAGACTGAGGAGCGGGAGAAAGTTGAACGTGAAGCTCGCGAAAAGGCTGCTTCGCTGCTAG                       | 1209 |

**Figure S1.** Genomic DNA sequence (coding region) and open reading frame of the PiCaMK1 gene. The underlined sequences indicate introns in the PiCaMK1 gene.

**Table S1.** Primers applied for gene cloning, knockout, and complementation in the present study.

| Primer Name                  | Sequence (5'→3')                             | Purpose                                               |
|------------------------------|----------------------------------------------|-------------------------------------------------------|
| PiCaMK1-F                    | CTCGTATTTCTCTAGTCGC                          | PiCaMK1 cloning                                       |
| PiCaMK1-R                    | AGTACAAGGCAGGATAGAC                          | PiCaMK1 cloning                                       |
| PiCaMK1-L-F                  | TAACGTTCCCGTTGTGGCT                          | Amplification of left arm                             |
| PiCaMK1-L-R                  | CTAGCTAGCGTGACTAGTCACCATTTCAAGCTCATCGTG      | Amplification of left arm                             |
| <sup>a</sup> Hyg-F           | GTGACTAGTCAGAAAGATGATTTGAAGGAGC              | <sup>a</sup> Hyg cloning                              |
| <sup>a</sup> Hyg-R           | CTAGCTAGCAAAGAAGGATTACCTCTAAACAAG            | <sup>a</sup> Hyg cloning                              |
| PiCaMK1-R-F                  | GTGACTAGTCAGTCACGCTAGCTAGGCGAAGACTTGAAACCCGA | Amplification of right arm                            |
| PiCaMK1-R-R                  | GCGATGATGGCTTGAATAATTG                       | Amplification of right arm                            |
| PiCaMK1- <sup>b</sup> Ko-F   | CATTGTTTCGTTTCGTCGACT                        | Mutant validation by PiCaMK1 amplification            |
| PiCaMK1- <sup>b</sup> Ko-R   | GAATGCATTAAAGACCGACCT                        | Mutant validation by PiCaMK1 amplification            |
| PiCaMK1- <sup>c</sup> Diag-F | GTACAGCCTCCTTATCGTAG                         | Mutant validation by <sup>d</sup> L-H-R amplification |
| PiCaMK1- <sup>c</sup> Diag-R | CATGCTGGTCAGTACCTCA                          | Mutant validation by <sup>d</sup> L-H-R amplification |
| PiCaMK1-COM-F                | CCCTCGAGGCAAGAAGATCTACGTGCAG                 | Complementation plasmid construction                  |
| PiCaMK1-COM-R                | GGACTAGTGATGTCCATTGCCCATTCT                  | Complementation plasmid construction                  |
| <sup>e</sup> Sur-F           | CTAGAGACTAGATCTGTGCC                         | <sup>e</sup> Sur gene cloning                         |
| <sup>e</sup> Sur-R           | AACTTAACCGTGCAGGCCAT                         | <sup>e</sup> Sur gene cloning                         |
| PiCaMK1-Probe-F              | TGCAATCACTCCAACATCC                          | Probe yield for southern blot                         |
| PiCaMK1-Probe-R              | GGCGGTTAGTTACATGTCA                          | Probe yield for southern blot                         |

**Note:** <sup>a</sup>Hyg-F/R indicates primers to amplify *hygromycin B* (*hyg*)-resistance cassette. <sup>b</sup>PiCaMK1-Ko-F/R indicates primers to validate knockout fragments. <sup>c</sup>PiCaMK1-Diag-F/R indicates primers to amplify diagnostic fragment. <sup>d</sup>L-H-R indicates the knockout fragment that contains left arm, *hyg*-resistance cassette and right arm. <sup>e</sup>Sur-F/R indicates primers to amplify *Sur*-resistance gene that encodes chlorimuron ethyl-degrading enzyme. The underlined sequences indicate restriction sites in the primers (i.e., GCTAGC: *Nhe* I, ACTAGT: *Spe* I, and CTCGAG: *Xho* I).

**Table S2.** Fungal CaMK genes used in multiple sequence alignments.

| Genus and Species           | CaMK Gene Accession Number |
|-----------------------------|----------------------------|
| <i>Penicillium italicum</i> | The present study          |

|                                  |              |
|----------------------------------|--------------|
| <i>Penicillium digitatum</i>     | XP_014532050 |
| <i>Penicillium expansum</i>      | XP_016598664 |
| <i>Penicillium brasilianum</i>   | CEO60329     |
| <i>Penicillium roqueforti</i>    | CDM34428     |
| <i>Aspergillus welwitschiae</i>  | XP_026623611 |
| <i>Aspergillus flavus</i>        | KOC14811     |
| <i>Aspergillus taichungensis</i> | PLN83689     |
| <i>Aspergillus nidulans</i>      | XP_660016    |
| <i>Neurospora crassa</i>         | AAL14118     |
| <i>Saccharomyces cerevisiae</i>  | BAA14383     |
| <i>Saccharomyces cerevisiae</i>  | BAA14384     |

**Table S3.** Fungal CaMK genes used in phylogenetic tree construction.

| Genus and Species                              | CaMK Gene Accession Number |
|------------------------------------------------|----------------------------|
| <i>Penicillium italicum</i>                    | The present study          |
| <i>Penicillium digitatum</i>                   | XP_014532050               |
| <i>Penicillium expansum</i>                    | XP_016598664               |
| <i>Penicillium roqueforti</i>                  | CDM34428                   |
| <i>Penicillium coprophilum</i>                 | OQE45907                   |
| <i>Penicillium arizonense</i>                  | XP_022485550               |
| <i>Penicillium subrubescens</i>                | OKP13003                   |
| <i>Aspergillus nidulans</i> FGSC A4            | XP_660016                  |
| <i>Aspergillus flavus</i> AF70                 | KOC14811                   |
| <i>Aspergillus mulundensis</i>                 | XP_026603689               |
| <i>Aspergillus welwitschiae</i>                | XP_026623611               |
| <i>Aspergillus calidoustus</i>                 | CEL09411                   |
| <i>Aspergillus taichungensis</i>               | PLN83689                   |
| <i>Aspergillus nomiae</i> NRRL 13137           | XP_015409963               |
| <i>Aspergillus japonicus</i> CBS 114.51        | XP_025523846               |
| <i>Aspergillus indologenus</i> CBS 114.80      | PY134311                   |
| <i>Aspergillus brunneoviolaceus</i> CBS 621.78 | XP_025445091               |
| <i>Aspergillus costaricensis</i> CBS 115574    | XP_025544052               |
| <i>Neurospora crassa</i>                       | AAL14118                   |

**Table S4.** Primers used in RT-qPCR.

| Gene ID  | Gene Function Annotation                  | Primer | Sequence (5'→3')       |
|----------|-------------------------------------------|--------|------------------------|
| EKV13547 | DNA primase                               | F      | GAAGGTCCCCGAGTTGATCG   |
|          |                                           | R      | AGCCACCACTGCAGACATAC   |
| EKV11776 | DNA replication licensing factor Mcm6     | F      | GATGCTCGCGGTATGTTCCA   |
|          |                                           | R      | TGGCTTCGTGAATAGCGACC   |
| EKV18089 | DNA polymerase $\delta$                   | F      | GAGAAGGACCAGCAATGGGA   |
|          |                                           | R      | CCAGCGAATGGCAAGGACAT   |
| EKV08814 | DNA polymerase $\epsilon$                 | F      | TTTCCGTTGACCCTACTGC    |
|          |                                           | R      | CTCCACGATTTGTGCCCTTA   |
| EKV11198 | DNA replication licensing factor Mcm3     | F      | CCGTGGCAAGAATGTGGA     |
|          |                                           | R      | CGAAGAGCAGAATAGGTGGC   |
| EKV17606 | Replication factor-a                      | F      | CCCATTCCAAATTGACGG     |
|          |                                           | R      | ACTTCTTGACTTCGCACTCG   |
| EKV16128 | DNA replication licensing factor Mcm2     | F      | GCACTTGTTGCACATTGACCA  |
|          |                                           | R      | TGCCGATGAACGAATCCACA   |
| EKV11033 | Nuclear condensing complex                | F      | ATTGCGAGTGCTACGGGTGT   |
|          |                                           | R      | GCATTTCCGGCTAGAGGCT    |
| EKV17483 | Cell-cycle checkpoint protein kinase      | F      | CGAATGGTTTCCGTCAGC     |
|          |                                           | R      | GAGTCACCGAGGCGTCTTT    |
| EKV19093 | Nuclear condensin complex Smc2            | F      | ATGGAACAGGAACACGAG     |
|          |                                           | R      | GCTCTGTCAAGTTGCGTAGG   |
| EKV04214 | Replication checkpoint protein            | F      | GTCGCATTGCAGCGTTTG     |
|          |                                           | R      | TCGGGTAGGAGATGTTAGGTGT |
| EKV16186 | Mitotic spindle checkpoint protein (Mad2) | F      | CGCAGTTGAAGGAATGGATG   |
|          |                                           | R      | GGTTAGTTTCGGACTCGGATG  |
| EKV16749 | Condensin complex subunit 1               | F      | GCCAAGTCAAGGTGAAGGG    |
|          |                                           | R      | GAAGAACATGCGAGCCAGAT   |
| EKV04683 | Xanthine dehydrogenase (oxidase)          | F      | CGTCTTCATCTCCGAGACCG   |
|          |                                           | R      | ATATGGCGTAGCCGTTGAGG   |
| EKV19574 | Ribonucleoside-diphosphate reductase      | F      | ATCAGGGTGGTAACAAGCG    |
|          |                                           | R      | GTCACAAAGCGTAGAAGAGGT  |
| EKV15599 | Ribonucleotide reductase RnrA             | F      | AGCGACCACGAATCAACC     |
|          |                                           | R      | GGAGAATGTGAGACCAGGCA   |

|                    |                                                                 |   |                       |
|--------------------|-----------------------------------------------------------------|---|-----------------------|
| EKV16890           | DNA-directed RNA polymerase III subunit Rpc34                   | F | TGAAGAACGGCATGACCGAA  |
|                    |                                                                 | R | GAAGTACTCGCAGGTCTCGG  |
| EKV07940           | Adenylate cyclase                                               | F | GACTTCTTTGAACCTCGCC   |
|                    |                                                                 | R | CAACTTGCCAATCTGAGCC   |
| EKV07761           | Uracil phosphoribosyltransferase                                | F | CATTCCAAGGACACAACGCC  |
|                    |                                                                 | R | CGGATCGGAGAATTGGCACT  |
| EKV07371           | Formamidopyrimidine-DNA glycosylase (H2TH domain)               | F | AGGTGCAACTAGTGCCGTTG  |
|                    |                                                                 | R | CCGTTTGGAATTGGCTGGTG  |
| EKV15299           | DNA repair protein RAD1                                         | F | GGGTAAAGTACCCAGCTACA  |
|                    |                                                                 | R | GAGTGTGACTGTCCGAGG    |
| EKV17484           | Phosphatidylinositol 4-kinase (STT4)                            | F | ACGGAGTATTGCTGGTGAG   |
|                    |                                                                 | R | GCAACGCAACCAAGTAGTGA  |
| EKV05405           | Cytochrome c oxidase assembly protein                           | F | ATCGGATGTCCTCCCTTGGA  |
|                    |                                                                 | R | CCTGGCGTGACACTGTATGT  |
| EKV18906           | F <sub>1</sub> /F <sub>0</sub> -ATP synthase                    | F | GGAGGGCCACAATGGAGTTT  |
|                    |                                                                 | R | GGAGGTTGGGATTAGGTGGC  |
| EKV07272           | Aldehyde dehydrogenase                                          | F | CATGGGTGGCACTATGGAT   |
|                    |                                                                 | R | CAAGATGGGGATGAAGGGA   |
| EKV06483           | Cysteine synthase                                               | F | CTGTCAAAACGGCGAGGAA   |
|                    |                                                                 | R | TCACAGCCCCACCAACA     |
| EKV18475           | Assimilatory sulfite reductase                                  | F | GCCAGAAAGTGACCCCTACC  |
|                    |                                                                 | R | GACTTGGAGGGCAGCTTCAT  |
| EKV04855           | Oligo-1,6-glucosidase ( $\alpha$ -amylase or maltase)           | F | TGGTTCAAAGAGTCCCGCTC  |
|                    |                                                                 | R | TTCTTCTGTTGCCTCGTCCC  |
| EKV05685           | Glucosamine-6-phosphate deaminase                               | F | TACTTGTGCAGCGTCATCGT  |
|                    |                                                                 | R | TCAGTGGGTGCTTTTCTCCG  |
| EKV11299           | NADH-cytochrome b <sub>5</sub> reductase                        | F | GTGGGTAGTCTGGCTCCAAG  |
|                    |                                                                 | R | ATGTTCTTCTCGGCACCCTC  |
| EKV15950           | Chitin synthase                                                 | F | AGCTCTTTCGGTGGTTCGAG  |
|                    |                                                                 | R | CAACCCTACCAGCACTCCAG  |
| EKV13467           | DnaJ-related protein                                            | F | TTACGATTCTTGGTCGCGCT  |
|                    |                                                                 | R | TGACGCGGACTTCGCTATAC  |
| EKV14522           | Polyubiquitin binding protein                                   | F | TCAGCTGGACAAGACGCAAT  |
|                    |                                                                 | R | AGACATTGTGACCGTGACCC  |
| EKV14057           | HSP90                                                           | F | TTCTACTCCGCCTACCTGG   |
|                    |                                                                 | R | CCTTGAGGGTGAAAGTGCC   |
| EKV13033           | HSP70                                                           | F | GAGTTCAAGCGCAAGCACAA  |
|                    |                                                                 | R | AGAGAGAGTTCGCTTGGCAC  |
| EKV13686           | Nuclear protein localization protein                            | F | AGTCAGGTGCTCAACGACTG  |
|                    |                                                                 | R | AGTGTACACCGTCGACTTC   |
| EKV17406           | Catabolic 3-dehydroquinase                                      | F | AGCTATGGTGCCGTCTTG    |
|                    |                                                                 | R | GGATTGATGATGATCCCGTC  |
| EKV18650           | Phospholipase D                                                 | F | CACTACCAGGATCGACTCGC  |
|                    |                                                                 | R | TGATGGCGCAATATGCGTTG  |
| PHI26_NewGene_31   | Vacuolar protein sorting-associated protein (VHS domain)        | F | ATATCTGTACCGGTGCTGCG  |
|                    |                                                                 | R | TGGGCTGAACGCTCTTTGAT  |
| PHI26_NewGene_32   | Vacuolar protein sorting-associated protein (FYVE-like protein) | F | AGTGTGCCTCAACTCCTTCG  |
|                    |                                                                 | R | GAAGGCAGTCCTACATCGCA  |
| Internal reference | $\beta$ -actin                                                  | F | TTACCTGATGAAGATCCTCGC |
|                    |                                                                 | R | TCTGGATCTCCTGCTCGAAG  |
